# Supplementary material for: Primary Series COVID-19 Vaccine Effectiveness among Health Care Workers in the Country of Georgia, March–December 2021
Source: Preprints.org preprint supplement (doi:10.20944/preprints202310.0224.v2), 2023-10-07
Supplement: Supplementary file 1 [file supplementary]

## Sheet: DescriptionEndpoints
Description of Clinical endpoints
Total Cohort	Vaccination Status at the time of onset of sympthoms
	Total Events	Unvaccinated	1 dose	2 dose
Total Events symptomatic/asymptomatic	235 (100)	157 (100)	0 (NA)	78 (100)
Washout	n= 235	n= 157	n= 0	n= 78
N symptomatic with positive PCR or RT - analysis	n= 235	n= 157	n= 0	n= 78
N with positive PCR or RT requiring medical care	n= 235	n= 157	n= 0	n= 78
N with positive PCR or RT attending emergencies	n= 235	n= 157	n= 0	n= 78
N with positive PCR or RT requiring hospitalization	n= 235	n= 157	n= 0	n= 78
N with positive PCR or RT dying	0	0	0	0
N symptomatic with positive PCR	141 (100)	89 (100)	0 (NA)	52 (100)
Washout	n= 141	n= 89	n= 0	n= 52
N symptomatic with positive PCR - analysis	n= 141	n= 89	n= 0	n= 52
N with positive PCR requiring medical care	n= 141	n= 89	n= 0	n= 52
N with positive PCR attending emergencies	n= 141	n= 89	n= 0	n= 52
N with positive PCR requiring hospitalization	n= 141	n= 89	n= 0	n= 52
N with positive PCR dying	0	0	0	0
N symptomatic with only positive RT	54 (100)	34 (100)	4 (100)	15 (100)
Washout	3 (6)	0 (0)	3 (75)	0 (0)
N symptomatic with positive RT - analysis	50 (93)	34 (100)	1 (25)	15 (100)
N with positive RT requiring medical care	37 (69)	23 (68)	4 (100)	9 (60)
N with positive RT attending emergencies	5 (9)	4 (12)	1 (25)	0 (0)
N with positive RT requiring hospitalization	12 (22)	9 (26)	1 (25)	2 (13)
N with positive RT dying	0	0	0	0

## Sheet: TAB_S1_study exit demographics
Table S1. Demographic, Occupational and Health Characteristics, Prior Infection Status of Participants in COVID-19 Vaccine Effectiveness study, by vaccination status at the end of the study period, Georgia, 2021
Characteristic/Category	All Participants, n=1561	Unvaccinated, n=479	Vaccinated with primary series (2 doses), n=1082
Age, n=1561
Median (IQR)	40 (30-53)	38 (28-52)	41 (30-53)
Age group, n=1561
<20, n (%)	16 (1)	3 (<1)	13 (1)
20-29, n (%)	373 (24)	138 (29)	235 (22)
30-39, n (%)	343 (22)	105 (22)	238 (22)
40-49, n (%)	330 (21)	94 (20)	236 (22)
50-59, n (%)	314 (20)	90 (19)	224 (21)
60+, n (%)	185 (12)	49 (10)	136 (13)
Sex, n=1561
female, n (%)	1318 (84)	397 (83)	921 (85)
male, n (%)	243 (16)	82 (17)	161 (15)
Hospital, n=1561
Acad. K Central University Hosp., n (%)	300 (19)	79 (16)	221 (20)
Batumi Republican Hospital, n (%)	276 (18)	77 (16)	199 (18)
Bochorishvili Clinic, n (%)	194 (12)	73 (15)	121 (11)
Bokeria Tbilisi Referral Hospital, n (%)	309 (20)	101 (21)	208 (19)
Caucasus Medical Centre, n (%)	299 (19)	93 (19)	206 (19)
Infectious Disease Hospital, n (%)	183 (12)	56 (12)	127 (12)
Occupation/Role in hospital, n=1561
Nurse or Midwife, n (%)	604 (39)	181 (38)	423 (39)
Medical Doctor, n (%)	306 (20)	50 (10)	256 (24)
Other, n (%)	651 (42)	248 (52)	403 (37)
Household size, n=1561
1-3, n (%)	703 (45)	220 (46)	483 (45)
4-5, n (%)	622 (40)	187 (39)	435 (40)
6+, n (%)	236 (15)	72 (15)	164 (15)
Any chronic condition, n=1561
No, n (%)	1171 (75)	355 (74)	816 (75)
Yes, n (%)	390 (25)	124 (26)	266 (25)
Number of chronic conditions, n=1561
0, n (%)	1171 (75)	355 (74)	816 (75)
1, n (%)	307 (20)	103 (22)	204 (19)
≥2, n (%)	83 (5)	21 (4)	62 (6)
Body mass index, n=1561
Underweight or normal, n (%)	721 (46)	224 (47)	497 (46)
Overweight, n (%)	481 (31)	145 (30)	336 (31)
Obese, n (%)	359 (23)	110 (23)	249 (23)
Smoking, n=1560
Currently/previously smokes, n (%)	530 (34)	155 (32)	375 (35)
Never smokes, n (%)	1030 (66)	323 (68)	707 (65)
Self-assessed health status, n=1561
Excellent, n (%)	127 (8)	35 (7)	92 (9)
Very good, n (%)	252 (16)	77 (16)	175 (16)
Good, n (%)	521 (33)	166 (35)	355 (33)
Fair, n (%)	641 (41)	191 (40)	450 (42)
Poor, n (%)	20 (1)	10 (2)	10 (<1)
Hands on care, n=1561
No, n (%)	745 (48)	268 (56)	477 (44)
Yes, n (%)	816 (52)	211 (44)	605 (56)
Flu vaccine September 2020, n=1561
No, n (%)	1068 (68)	389 (81)	679 (63)
Yes, n (%)	492 (32)	89 (19)	403 (37)
Face-to-face patient contact, n=1561
No, n (%)	1225 (78)	355 (74)	870 (80)
Yes, n (%)	336 (22)	124 (26)	212 (20)
SARS CoV-2 Vaccine product received prior to the end of the study period, n= 1561
Unvaccinated, n (%)	344 (22)	344 (72)	0 (0)
ChAdOx1-S - 1 dose, n (%)	2 (<1)	2 (<1)	0 (0)
ChAdOx1-S - 2 doses, n (%)	26 (2)	0 (0)	26 (2)
BNT162b2 - 1 dose, n (%)	87 (6)	86 (18)	1 (<1)
BNT162b2 - 2 dose, n (%)	745 (48)	0 (0)	745 (69)
BBIBP-CorV - 1 dose, n (%)	34 (2)	33 (7)	1 (<1)
BBIBP-CorV - 2 dose, n (%)	238 (15)	0 (0)	238 (22)
CoronaVac - 1 dose, n (%)	14 (<1)	14 (3)	0 (0)
CoronaVac - 2 doses, n (%)	58 (4)	0 (0)	58 (5)
Other vaccines, n (%)	13 (<1)	0 (0)	13 (1)

## Sheet: TABLE S2 VE vs. PCR infection
Table 2. Vaccine effectiveness against sympthomatic PCR confirmed COVID-19 infection for full cohort, and stratified by previous infection, vaccine product, and for Delta-predominant period
[Defining prior COVID infection as PCR RapidTest Sero-confirmed prior to enrolment]
	N participants	Total person-time (days)	PCR-confirmed sympthomatic COVID-19 infection	Unadjusted HR	(95% CI)	Unadjusted VE	(95%CI)	Adjusted HR	(95%CI)	Adjusted VE	(95%CI)
Two doses (all vaccines)
Total cohort	1561
Unvaccinated	1300	112050	89
≥14d from 2nd dose	1054	105080	52	0.6	(1; 0.4)	35.4	(4.6; 56.2)	0.5	(0.7; 0.3)	52.4	(30; 68)	AgeGp2+HealthStatusGp2+HospitalSite+PatientNocontactGp+SeroPrevInfection+SexGp+strata(AgeGp2)+strata(HospitalSite)
Without Prior Infection
Unvaccinated	437	36109	62
≥14d from 2nd dose	357	37683	40	0.5	(0.8; 0.3)	46	(16.6; 65)	0.5	(0.8; 0.3)	48.3	(20; 67)	BMIGp+HospitalSite+PatientNocontactGp+SexGp+strata(AgeGp2)+strata(PatientNocontactGp )
With Prior Infection
Unvaccinated	863	75941	27
≥14d from 2nd dose	697	67397	12	0.5	(1.2; 0.2)	46.6	(-15.9; 75.4)	0.6	(1.2; 0.2)	44.6	(-23; 75)	AgeGp2+HealthStatusGp2+HospitalSite+SexGp+SmokingGp2
Two doses (Pfizer vaccine)
Total cohort	1470
Unvaccinated	1300	112050	89
≥14d from 2nd dose	732	72695	25	0.5	(0.8; 0.3)	51	(20.1; 69.9)	0.4	(0.6; 0.2)	63.4	(41; 77)	HealthStatusGp2+HospitalSite+PatientNocontactGp+SeroPrevInfection+SexGp+strata(HealthStatusGp2)+strata(HospitalSite)
Without Prior Infection
Unvaccinated	437	36109	62
≥14d from 2nd dose	239	25763	22	0.4	(0.7; 0.3)	55.9	(26.3; 73.6)	0.4	(0.7; 0.3)	55.2	(25; 73)	HospitalSite+PatientNocontactGp+strata(PatientNocontactGp)
Two doses (Sinopharm vaccine)
Total cohort	1337
Unvaccinated	1300	112050	89
≥14d from 2nd dose	227	21136	18	1	(1.8; 0.6)	-1.3	(-81.4; 43.4)	0.7	(1.2; 0.4)	33.1	(-20; 63)	HealthStatusGp2+HospitalSite+PatientNocontactGp+SeroPrevInfection+SexGp	*Considering only PCR and rapid test as previous infection
Without Prior Infection
Unvaccinated	437	36109	62
≥14d from 2nd dose	91	8977	15	0.9	(1.8; 0.5)	6.9	(-81.2; 52.2)	0.8	(1.6; 0.4)	19.8	(-61; 60)	BMIGp+HospitalSite+PatientNocontactGp+SexGp
Two doses (Delta period)
Total cohort	1556
Unvaccinated	1162	72917	66
≥14d from 2nd dose	1068	96751	49	0.7	(1; 0.4)	33.3	(-1.4; 56.1)	0.5	(0.8; 0.4)	45.1	(17; 64)	AgeGp2+BMIGp+HealthStatusGp2+HospitalSite+PatientNocontactGp+SeroPrevInfection+SexGp+SmokingGp2+strata(PatientNocontactGp)
Without Prior Infection
Unvaccinated	378	21896	44
≥14d from 2nd dose	339	30932	36	0.6	(1; 0.4)	39.8	(3.6; 62.4)	0.6	(0.9; 0.3)	43.5	(8; 65)	AnyChronGp+BMIGp+HospitalSite+PatientNocontactGp+SexGp+strata(PatientNocontactGp)
With Prior Infection
Unvaccinated	784	51021	22
≥14d from 2nd dose	729	65819	13	0.6	(1.2; 0.3)	43.9	(-22.1; 74.3)	0.6	(1.4; 0.3)	38.5	(-39; 73)	AgeGp2+HealthStatusGp2+HospitalSite
Two doses (Pfizer-Delta period)
Total cohort	1371
Unvaccinated	1162	72917	66
≥14d from 2nd dose	733	64109	23	0.6	(1; 0.3)	43.2	(3.3; 66.7)	0.5	(0.8; 0.3)	53.4	(22; 72)	HospitalSite+PatientNocontactGp+SeroPrevInfection+SexGp+SmokingGp2+strata(PatientNocontactGp)+strata(SmokingGp2)	*Considering only PCR and rapid test as previous infection
Without Prior Infection
Unvaccinated	378	21896	44
≥14d from 2nd dose	222	19615	19	0.6	(1.1; 0.3)	40.2	(-5.8; 66.2)	0.6	(1.1; 0.4)	35.9	(-14; 64)	AgeGp2+AnyChronGp+BMIGp+HealthStatusGp2+HouseholdGp+PatientNocontactGp+SexGp+SmokingGp2+strata(AgeGp2)+strata(PatientNocontactGp)
Two doses (Sinopharm-Delta period)
Total cohort	1250
Unvaccinated	1161	72906	66
≥14d from 2nd dose	227	20221	18	1	(1.9; 0.6)	-3.9	(-88.1; 42.6)	0.7	(1.3; 0.4)	27.5	(-33; 60)	AgeGp2+HospitalSite+PatientNocontactGp+SeroPrevInfection+SexGp	*Considering only PCR and rapid test as previous infection
Without Prior Infection
Unvaccinated	378	21896	44
≥14d from 2nd dose	91	8474	15	0.9	(1.8; 0.5)	9.1	(-81.3; 54.5)	0.8	(1.7; 0.4)	19.2	(-71; 62)	AgeGp2+BMIGp+HospitalSite+PatientNocontactGp+SexGp

## Sheet: TAB S3. VE vs. PCR RT Sero
Table S3. Vaccine effectiveness of primary series BNT162b2 against COVID-19 infection documented by PCR, rapid test and serology, stratified by previous infection.
[Defining prior COVID infection as PCR RapidTest, Sero-confirmed prior to enrolment]
	N participants	Total person-time (days)	PCR-confirmed infection	Rapit test-confirmed infection	Seroconversion with Platelia	All COVID-19 infections	Unadjusted HR	(95% CI)	Unadjusted VE	(95%CI)	Adjusted HR	(95%CI)	Adjusted VE	(95%CI)
Two doses (Pfizer vaccine)
Total cohort	1413
Unvaccinated	1300	106206	46	20	170	236
≥14d from 2nd dose	557	51160	13	2	19	34	0.4	(0.6; 0.3)	58.1	(37.2; 72.1)	0.7	(1; 0.5)	32	(0; 53)	HospitalSite+HospitalSite+SeroPrevInfection+strata(HospitalSite)	*violation proportional hazards
Without Prior Infection
Unvaccinated	437	30370	16	10	165	191
≥14d from 2nd dose	73	5266	7	2	16	25	0.9	(1.4; 0.6)	6.2	(-40.7; 37.5)	1	(1.6; 0.7)	-1	(-58; 35)	AgeGp2+AnyChronGp+BMIGp+HealthStatusGp2+HospitalSite+HouseholdGp+HwHandsonCareGp+SexGp+SmokingGp2+strata(SmokingGp2)	*violation proportional hazards
With Prior Infection
Unvaccinated	863	75836	30	10	5	45
≥14d from 2nd dose	484	45894	6	0	3	9	0.3	(0.7; 0.1)	68.6	(26.4; 86.6)	0.3	(0.7; 0.1)	67	(26; 87)	HospitalSite

## Sheet: TAB S4 VEvs.previnf+ -vac(Sero
Table S4. Combined effect of previous infection and primary series BNT162b2 vaccination on vaccine effectiveness against combined endpoint of PCR, rapid test or seroconversion
	N participants	Total person-time (days)	PCR-confirmed sympthomatic COVID-19 infection	Rapid Test confirmed sympthomatic COVID-19 infection	Seroconversion with Platelia	All sympthomatic COVID-19 infections	Unadjusted HR	(95% CI)	Unadjusted VE	(95%CI)	Adjusted HR	(95%CI)	Adjusted VE	(95%CI)
Two doses (Pfizer)/Previous infection status	1413
Unvaccinated/no previous infection [ref]	437	30370	16	10	165	191
Unvaccinated/previously infected	863	75836	30	10	5	45	0.1	(0.1; 0.1)	90.1	(86.4; 92.9)	0.1	(0.1; 0.1)	90.5	(87; 93)	AnyChronGp+HospitalSite+SexGp+strata(HospitalSite)
≥14d from 2nd dose/no previous infection	73	5266	7	2	16	25	0.9	(1.4; 0.6)	6.2	(-40.7; 37.5)	0.9	(1.3; 0.6)	14.6	(-31; 44)	AgeGp2+AnyChronGp+HospitalSite+HwHandsonCareGp+SexGp+strata(HospitalSite)	*violation proportional hazards
≥14d from 2nd dose/previously infected	484	45894	6	0	3	9	0	(0.1; 0)	95.9	(91.8; 97.9)	0	(0.1; 0)	96.1	(92; 98)	AnyChronGp+HospitalSite+strata(HospitalSite)

## Sheet: Table S5. Adjument variables
Table S5: Adjustment Variables for Vaccine Effectiveness Models or category by Different Periods and Outcomes
Period	Outcome	Model/Category	Variables in adjustment
Overall study	All symptomatic SARS-CoV-2 infections	Any vaccine	BMI category, hospital, face-to-face patient contact, previous infection, sex
		Any vaccine (without previous infection)	BMI category, hospital, face-to-face patient contact, sex
		Any vaccine (with previous infection)	Age group, hospital
		BNT162b2 vaccine	BMI category, hospital, face-to-face patient contact*, previous infection
		BNT162b2 vaccine (without previous infection)	BMI category, hospital, face-to-face patient contact*, sex
		BBIBP-CorV vaccine	BMI category, hospital, face-to-face patient contact, previous infection, sex
		BBIBP-CorV vaccine (without previous infection)	BMI category, hospital, face-to-face patient contact*, sex
Delta	All symptomatic SARS-CoV-2 infections	Any vaccine	Age group, BMI category, hospital, face-to-face patient contact, previous infection, sex
		Any vaccine (without previous infection)	BMI category, hospital, face-to-face patient contact, sex
		Any vaccine (with previous infection)	Age group, self-perceived health status, hospital
		BNT162b2 vaccine	Hospital, face-to-face patient contact*, previous infection
		BNT162b2 vaccine (without previous infection)	BMI category, hospital, face-to-face patient contact, face-to-face patient contact*
		BBIBP-CorV vaccine	Age group, BMI category, hospital, face-to-face patient contact, previous infection
		BBIBP-CorV vaccine (without previous infection)	BMI category, hospital, sex
Overall study	Medically attended SARS-CoV-2 infection	Any vaccine	Age group*, Any comorbidity, hospital, household size, previous infection, sex
		Any vaccine (without previous infection)	Any comorbidity, BMI category, self-perceived health status, hospital, household size, hands-on care, face-to-face patient contact, sex, smoking*
		Any vaccine (with previous infection)	Age group, any comorbidity, hospital, smoking
		BNT162b2 vaccine	Any comorbidity, BMI category, hospital, previous infection, sex
		BNT162b2 vaccine (without previous infection)	BMI category, hospital, sex, smoking
Delta	Medically attended SARS-CoV-2 infection	Any vaccine	Hospital, face-to-face patient contact*, previous infection
		Any vaccine (without previous infection)	BMI category, hospital, face-to-face patient contact*
		Any vaccine (with previous infection)	Age group, any comorbidity, self-perceived health status, hospital
Overall study	Hospitalization due to SARS-CoV-2 infection	Any vaccine	Any comorbidity, BMI category, hospital, previous infection, sex
		Any vaccine (without previous infection)	BMI category, hospital, sex, smoking
Delta		Any vaccine	Any comorbidity, hospital, face-to-face patient contact*,previous infection
		Any vaccine (without previous infection)	BMI category, hospital
Overall study	All symptomatic SARS-CoV-2 infections	Unvaccinated (with previous infection)	BMI category, hospital, face-to-face patient contact, sex
		Any vaccine (without previous infection)	BMI category, hospital, face-to-face patient contact, sex
		Any vaccine (with previous infection)	BMI category, self-perceived health status, hospital, face-to-face patient contact, sex
		BNT162b2 (with previous infection)	Any comorbidity, hospital, hands-on care, sex
		BNT162b2 (without previous infection)	BMI category, hospital, face-to-face patient contact*, sex
		BBIBP-CorV (with previous infection)	Any comorbidity, hospital, hands-on care, sex
		BBIBP-CorV (without previous infection)	BMI category, hospital, face-to-face patient contact*, sex
Delta	All symptomatic SARS-CoV-2 infections	Unvaccinated (with previous infection)	Age group, BMI category, hospital, face-to-face patient contact
		Any vaccine (without previous infection)	BMI category, hospital, face-to-face patient contact, sex
		Any vaccine (with previous infection)	BMI category, hospital, face-to-face patient contact*
		BNT162b2 (with previous infection)	Age group, BMI category, hospital, face-to-face patient contact
		BNT162b2 without previous infection	BMI category, hospital, face-to-face patient contact*
		BBIBP-CorV (with previous infection)	Age group, BMI category, hospital, face-to-face patient contact
		BBIBP-CorV (without previous infection)	BMI category, hospital, sex
Overall study	All symptomatic SARS-CoV-2 infections	Any vaccine (14d - 89d from 2nd dose)	BMI category, hands-on care, previous infection, sex
		Any vaccine (90d-179d from 2nd dose)	Self-perceived health status, face-to-face patient contact, previous infection
		Any vaccine (≥180d from 2nd dose)	Previous infection, sex, face-to-face patient contact*
		BNT162b2 vaccine (14d - 89d from 2nd dose)	BMI category, hospital, face-to-face patient contact, previous infection, sex
		BNT162b2 vaccine (90d-179d from 2nd dose)	Age group, any comorbidity, BMI category, self-perceived health status, hospital, face-to-face patient contact, previous infection, sex
		BNT162b2 vaccine (≥180d from 2nd dose)	Any comorbidity, hospital, previous infection, sex
		BBIBP-CorV vaccine (14d - 89d from 2nd dose)	BMI category, hospital, face-to-face patient contact, previous infection, sex
		BBIBP-CorV vaccine (90d-179d from 2nd dose)	Age group, any comorbidity, BMI category, self-perceived health status, hospital, face-to-face patient contact, previous infection, sex
Delta	All symptomatic SARS-CoV-2 infections	Any vaccine (14d - 89d from 2nd dose)	Age group, BMI category, face-to-face patient contact, previous infection, smoking*
		Any vaccine (90d-179d from 2nd dose)	Age group, BMI category, self-perceived health status, face-to-face patient contact, previous infection
		Any vaccine (≥180d from 2nd dose)	Age group, BMI category, self-perceived health status, hands-on care, previous infection, sex
		BNT162b2 vaccine (14d - 89d from 2nd dose)	Age group, BMI category, hospital, face-to-face patient contact, previous infection, smoking*
		BNT162b2 vaccine (90d-179d from 2nd dose)	Age group, BMI category, self-perceived health status, hospital, household size, face-to-face patient contact, previous infection, sex
		BNT162b2 vaccine (≥180d from 2nd dose)	Age group, BMI category, self-perceived health status, hospital, hands-on care, previous infection, sex
		BBIBP-CorV vaccine (14d - 89d from 2nd dose)	Age group, BMI category, hospital, face-to-face patient contact, previous infection
		BBIBP-CorV vaccine (90d-179d from 2nd dose)	Age group, BMI category, self-perceived health status, hospital, face-to-face patient contact, previous infection
Overall study	All SARS-CoV-2 infections (PCR or rapid test or seroconversion)	BNT162b2 vaccine	Hospital*, previous infection
		BNT162b2 vaccine (without previous infection)	Age group, any comorbidity, BMI category, self-perceived health status, hospital, household size, hands-on care, sex, smoking*
		BNT162b2 vaccine (with previous infection)	Hospital
*stratification
